# Supplementary material
Source: PubMed Central journal article supplement (PMC6347107)
Supplement: NIHMS980944-supplement-Appendix.pdf [file NIHMS980944-supplement-Appendix.pdf]

**Supplemental Table: Characteristics of SSPs (SSPs) by On-site HIV/HCV Testing Availability in the United States (N=127)**

| Program Characteristics                                                | Any HIV and/or<br>HCV onsite testing | No onsite HIV or<br>HCV testing | p-value* |
|------------------------------------------------------------------------|--------------------------------------|---------------------------------|----------|
|                                                                        | Mean (Median)                        | Mean (Median)                   |          |
| <b>Number of syringes distributed (N=114)</b>                          | 341,533 (152,823)                    | 260,688 (90,000)                | 0.69     |
| <b>Total SEP budget* (N=102)</b>                                       | \$184,733 (83,038)                   | \$30,882 (11,112)               | <0.01    |
|                                                                        | n (%)                                | n (%)                           |          |
| <b>Location</b>                                                        |                                      |                                 | 0.37     |
| Rural                                                                  | 22(19)                               | 5 (36)                          |          |
| Suburban                                                               | 12 (11)                              | 1 (7)                           |          |
| Urban                                                                  | 79 (70)                              | 8 (57)                          |          |
| <b>Region</b>                                                          |                                      |                                 | 0.03     |
| Northeast                                                              | 35 (31)                              | 1 (7)                           |          |
| Midwest                                                                | 28 (25)                              | 1 (7)                           |          |
| South                                                                  | 13 (12)                              | 3 (21)                          |          |
| West                                                                   | 35 (31)                              | 8 (57)                          |          |
| Puerto Rico                                                            | 2 (2)                                | 1 (7)                           |          |
| <b>SEP program size (syringes dispensed)</b>                           |                                      |                                 | 0.32     |
| Small (1-9,999)                                                        | 6 (5)                                | 2 (14)                          |          |
| Medium (10,000-55,000)                                                 | 19 (17)                              | 4 (29)                          |          |
| Large (55,001-499,999)                                                 | 63 (56)                              | 5 (36)                          |          |
| Very Large (greater or equal to 500,000)                               | 13 (12)                              | 2 (14)                          |          |
| None/unknown/missing                                                   | 12 (11)                              | 1 (7)                           |          |
| <b>Budget size</b>                                                     |                                      |                                 | <0.01    |
| <\$25,000                                                              | 14 (12)                              | 7 (50)                          |          |
| \$25,000-\$100,000                                                     | 32 (28)                              | 4 (29)                          |          |
| >\$100,000                                                             | 44 (39)                              | 1 (7)                           |          |
| None/unknown/missing                                                   | 23 (20)                              | 2 (14)                          |          |
| <b>Receives Public Funding</b>                                         | 76 (67)                              | 5 (36)                          | 0.04     |
| <b>Medical Billing</b>                                                 |                                      |                                 | 0.07     |
| Currently uses medical billing                                         | 12 (11)                              | 1 (7)                           |          |
| Capacity for billing, but not currently using                          | 27 (24)                              | 0 (0)                           |          |
| No capacity for medical billing                                        | 74 (65)                              | 13 (93)                         |          |
| <b>Part of a larger organization</b>                                   | 92 (81)                              | 6 (43)                          | <0.01    |
| <b>Type of organization</b>                                            |                                      |                                 | 0.18     |
| Operated by city, county, or state health department                   | 20 (18)                              | 4 (29)                          |          |
| Operated by another type of org                                        | 19 (17)                              | 2 (14)                          |          |
| Stand-alone non-profit org (tax exempt)                                | 59 (53)                              | 4 (29)                          |          |
| Stand-alone other org                                                  | 14 (13)                              | 4 (29)                          |          |
| <b>Partnerships with other programs (not mutually exclusive)</b>       |                                      |                                 |          |
| Joined a coalition or association with other SEPs (other than NASEN)   | 49 (43)                              | 4 (29)                          | 0.29     |
| Partnered with a hospital to provide clinical services at your program | 24 (21)                              | 0 (0)                           | 0.07     |
| Partnered with a health care org to co-locate clinical and HR services | 49 (43)                              | 3 (21)                          | 0.12     |
| Partnered with a health care org to co-locate pharmacy services        | 21 (19)                              | 1 (7)                           | 0.46     |
| Formed a partnership or joint venture with other SEPs                  | 31 (27)                              | 3 (21)                          | 0.76     |
| Merged with another SEP                                                | 6 (5)                                | 0 (0)                           | 0.99     |
| Begun plans to merge with another SEP                                  | 7 (6)                                | 0 (0)                           | 0.99     |
| <b>Any Mobile Exchange</b>                                             | 70 (62)                              | 10 (71)                         | 0.49     |
| <b>Detox offered on-site</b>                                           | 3 (3)                                | 0 (0)                           | 0.99     |
| <b>Buprenorphine and/or methadone on-site</b>                          | 13 (12)                              | 1 (7)                           | 0.99     |

\*Significant t-test or chi-square test at <0.05
